# Supplementary material for: Antifungal Activity of 2-Allylphenol Derivatives on the Botrytis cinerea Strain: Assessment of Possible Action Mechanism
Source: MDPI journal article supplement (doi:10.3390/ijms24076530), 2023-03-31
Supplement: s1 [file s1]

# Antifungal Activity of 2-Allylphenol Derivatives on the *Botrytis cinerea* Strain: Assessment of Possible Action Mechanism

Andres F. Olea <sup>1</sup>, Julia Rubio <sup>1</sup>, Claudia Sedan <sup>1</sup>, Denisse Carvajal <sup>1</sup>, Maria Nuñez <sup>2</sup>, Luis Espinoza <sup>2</sup>, Ligia Llovera <sup>2</sup>, Gerard Nuñez <sup>2</sup>, Lautaro Torga <sup>2,\*</sup> and Héctor Carrasco <sup>1,\*</sup>

<sup>1</sup> Grupo QBAB, Instituto de Ciencias Químicas Aplicadas, Facultad de Ingeniería, Universidad Autónoma de Chile, San Miguel, Santiago 8900000, Chile

<sup>2</sup> Departamento de Química, Universidad Técnica Federico Santa María, Avenida España 1680, Valparaíso CP 2340000, Chile

\* Correspondence: lautaro.torga@usm.cl (L.T.); hector.carrasco@uautonoma.cl (H.C.)

**Supplementary Materials:** The following supporting information can be downloaded at: [www.mdpi.com/xxx/s1](http://www.mdpi.com/xxx/s1), **Figure S1:** 1D-NMR spectra of 2-allyl-1-methoxy-4-nitrobenzene (**11**); **Figure S2:** 1D-NMR spectra of 2-allyl-1-methoxy-4-nitrobenzene (**11**). **Figure S3:** MS (EI+) Chromatogram and spectrum of 2-allyl-1-methoxy-4-nitrobenzene (**11**); **Table S1:** Primers (completing description)

<sup>1</sup>H-NMR

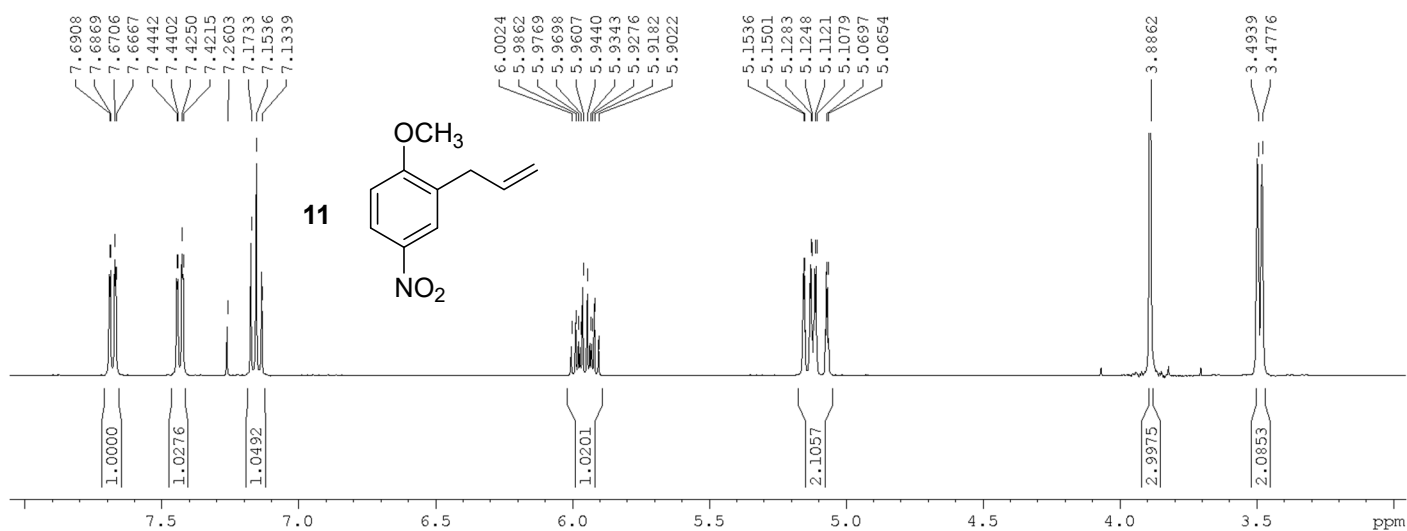

<sup>13</sup>C-NMR

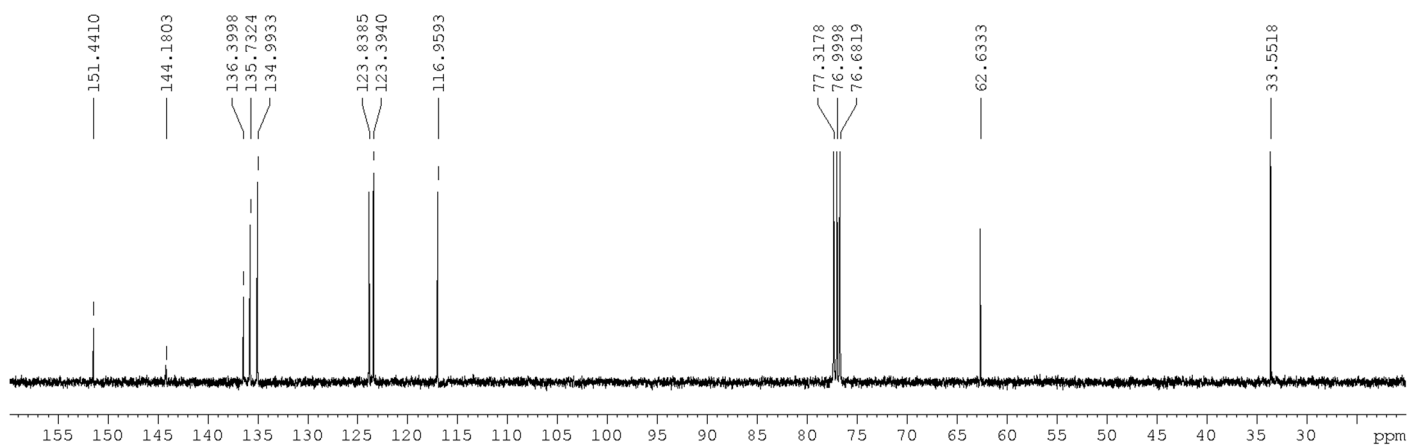

Dept-135

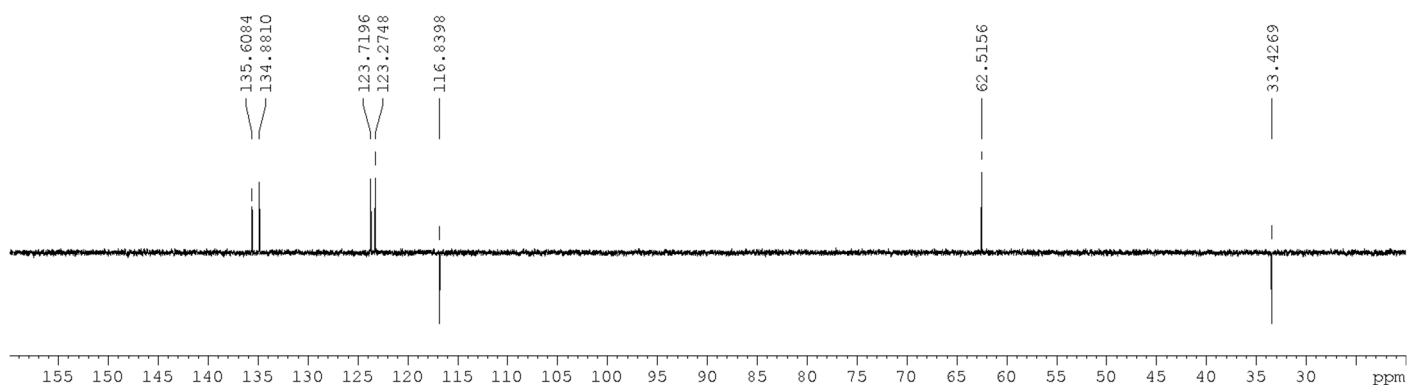

Figure S1: 1D-NMR spectra of 2-allyl-1-methoxy-4-nitrobenzene (**11**).

2D-HSQC

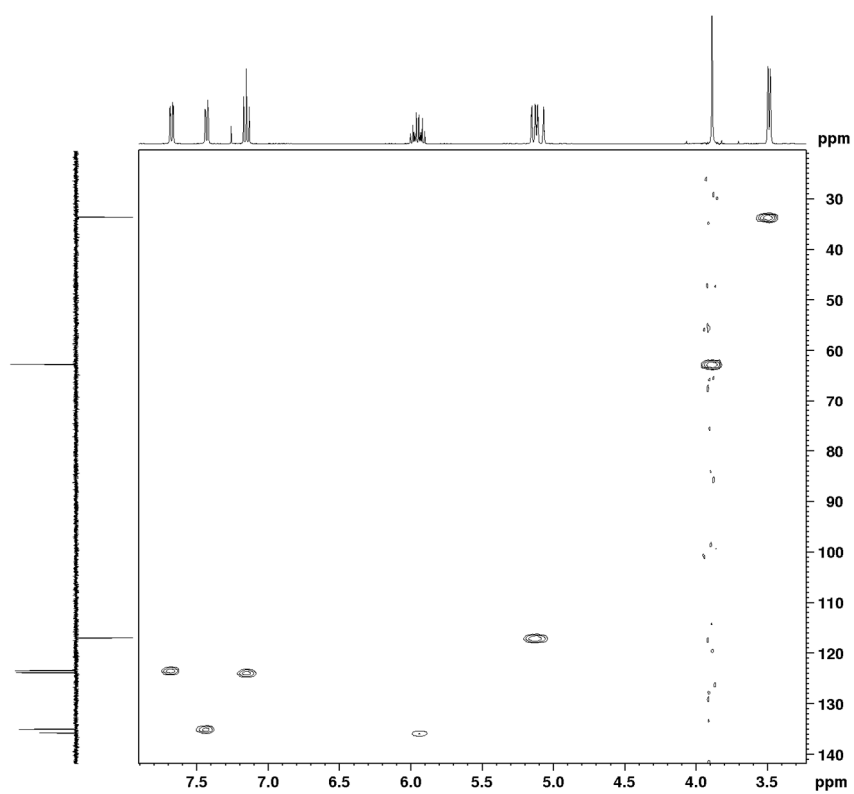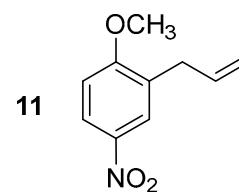

2D-HMBC

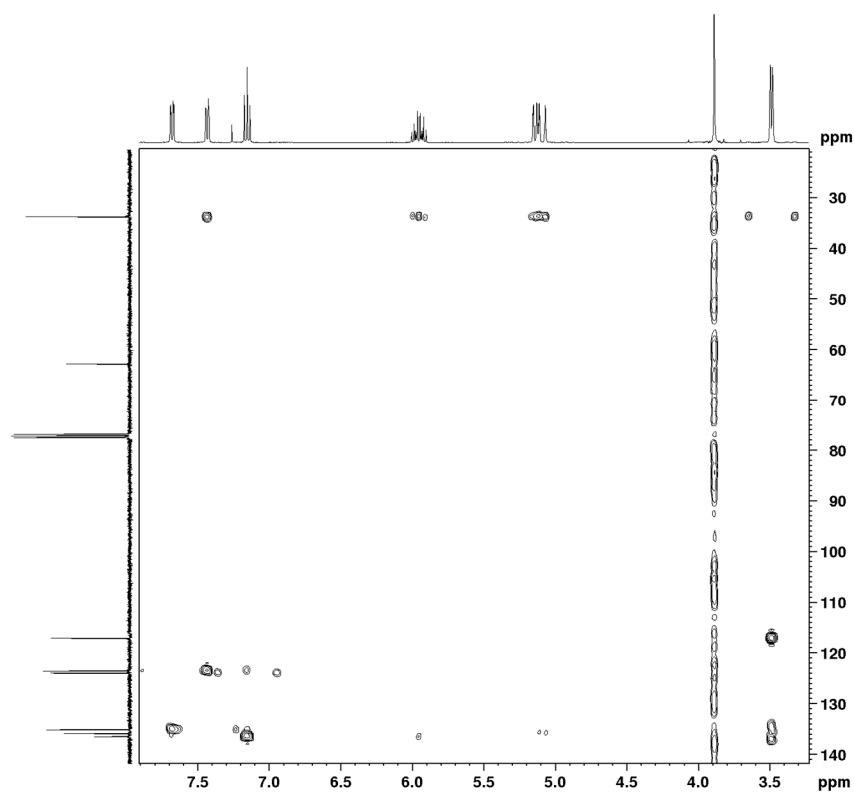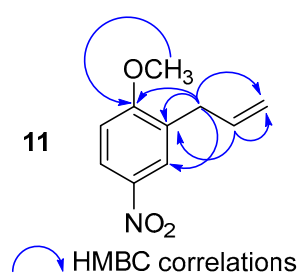

**Figure S2:** 2D-NMR spectra of 2-allyl-1-methoxy-4-nitrobenzene (**11**).

Chromatogram: retention time 9.665 min.

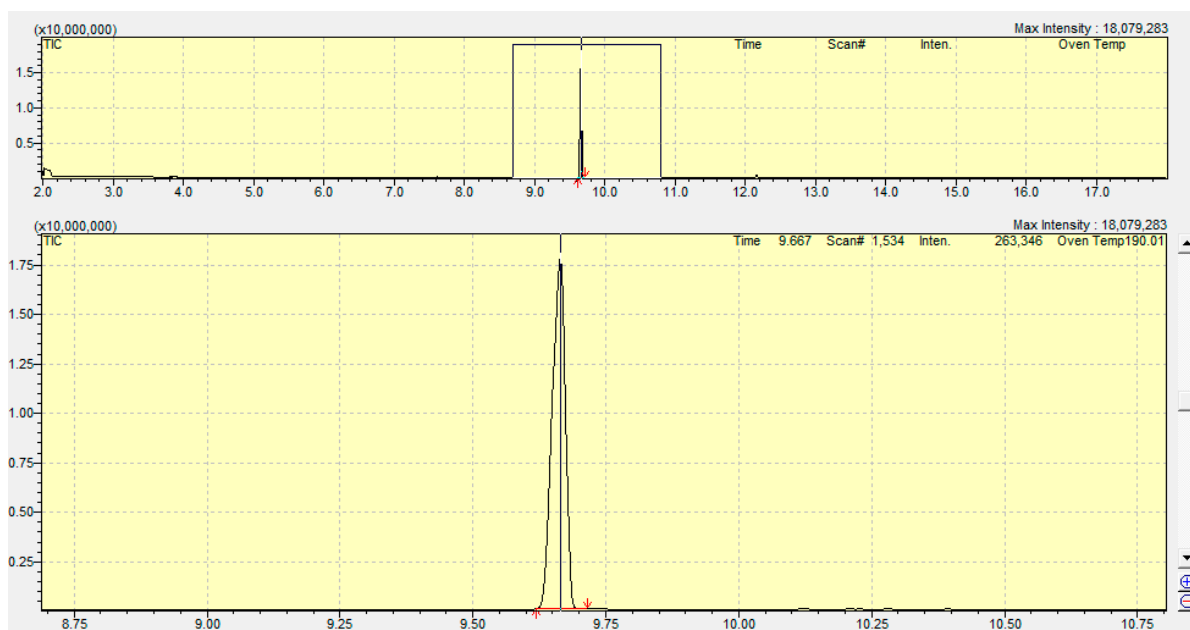

[M+] 193 m/z

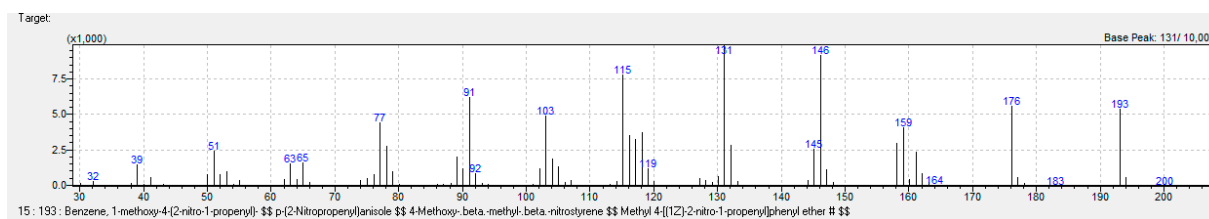

**Figure S3:** GC/MS (EI<sup>+</sup>) Chromatogram and spectrum of 2-allyl-1-methoxy-4-nitrobenzene (11).

**Table S1:** Primers

| Primers         | Sequences                   | T <sub>m</sub> °C | Primer's efficiency |
|-----------------|-----------------------------|-------------------|---------------------|
| <i>cas-1</i> F  | 5'-ATGGAGGCTATGGAGCACCA-3'  | 57                | 97                  |
| <i>cas-1</i> R  | 5'-GCAACACCGCTCATATCACCT-3' |                   |                     |
| <i>Bcaox</i> F  | 5'-CAATGTATGTATCAAGGGTA-3'  | 57                | 99                  |
| <i>Bcaox</i> R  | 5'-TCTTCATGCGATCCCTCA-3'    |                   |                     |
| <i>Bchex</i> F  | 5'-TCTACTTCAACGAGGCTTC-3'   | 57                | 99                  |
| <i>Bchex</i> R  | 5'-CACCAGATTGACCGAAAAC-3'   |                   |                     |
| <i>BcUBcE</i> F | 5'-CATCAACTCCAACGGAAGCA-3'  | 57                | 98                  |
| <i>BcUBcE</i> R | 5'-TCGGTCGGTCTTGTAACGT-3'   |                   |                     |
